# Supplementary material
Source: publisher site journal article supplement (https://www.spandidos-publications.com/8573/downloadSupplementary)

Figure S1. Minimal effects of TTFields on a non-malignant human fibroblast cell line. CCD-112CoN cells were exposed to TTFields under the same experimental conditions used for T-cell acute lymphoblastic leukemia cell lines. (A) Metabolic activity assessed by Water-Soluble Tetrazolium-8 (OD measured at 450 nm). (B) Cell number normalized to the untreated control (% of control). Data are presented as the mean  $\pm$  SD from at least three independent experiments. Statistical significance was evaluated using an unpaired two-tailed Welch's t-test. ns, not significant; OD, optical density; TTFields/TTF, Tumor Treating Fields.

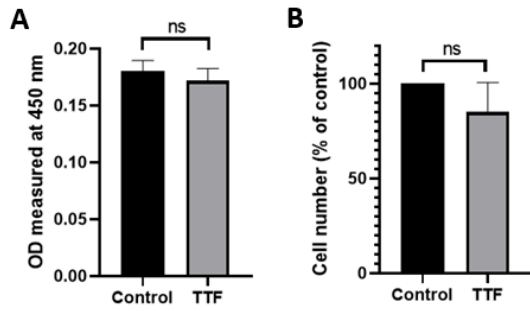

Supplement: Supplementary file [file downloadSupplementary]
